# Supplementary material
Source: PubMed Central journal article supplement (PMC4453832)
Supplement: NIHMS412265-supplement-10751_2012_643_MOESM1_ESM.pdf [file NIHMS412265-supplement-10751_2012_643_MOESM1_ESM.pdf]

## Supporting Information

### Nuclear Resonance Vibrational Spectroscopy (NRVS) of Rubredoxin and MoFe Protein Crystals

Yisong Guo,<sup>†</sup> Eric Brecht,<sup>‡</sup> Kristen Aznavour,<sup>‡</sup> Jay C. Nix,<sup>§</sup> Yuming Xiao,<sup>†</sup> Hongxin Wang,<sup>†,§</sup> Simon J. George,<sup>§</sup> Robert Bau,<sup>£</sup> Stephen Keable,<sup>‡</sup> John W. Peters,<sup>‡</sup> Michael W.W. Adams,<sup>°</sup> Francis E. Jenney Jr.,<sup>Δ</sup> Wolfgang Sturhahn,<sup>‡</sup> Ercan E. Alp,<sup>‡</sup> Jiyong Zhao,<sup>‡</sup> Yoshitaka Yoda,<sup>¥</sup> & Stephen P. Cramer<sup>∞,†,§,\*</sup>

<sup>†, \*\*</sup> *Department of Applied Science, University of California, Davis, CA 95616*

<sup>‡</sup> *Department of Chemistry and Biochemistry, Montana State University, Bozeman, MT 59717*

<sup>£</sup> *Department of Chemistry, University of Southern California, Los Angeles, CA 90089*

<sup>§</sup> *Physical Biosciences Division, Lawrence Berkeley National Laboratory, Berkeley, CA 94720*

<sup>‡</sup> *Advanced Photon Source, Argonne National Laboratory, Argonne, IL 60439*

<sup>¥</sup> *JASRI, SPring-8, 1-1-1 Kouto, Sayo-cho, Sayo-gun, Hyogo 679-5198, Japan*

<sup>°</sup> *Department of Biochemistry and Molecular Biology, University of Georgia, Athens, GA 30602*

<sup>Δ</sup> *Georgia Campus, Philadelphia College of Osteopathic Medicine, Suwanee, GA 30024*

<sup>∞</sup> *Department of Chemistry, University of California, Davis, CA 95616*

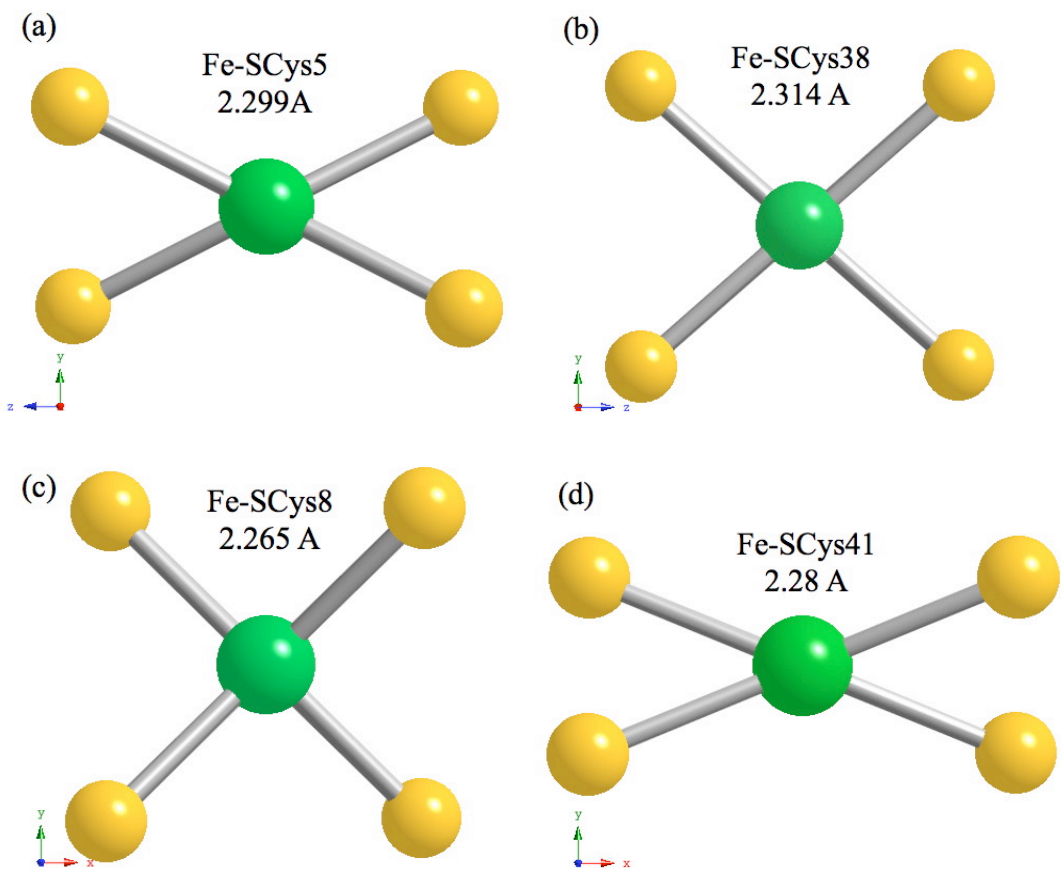

**Figure S1.** Overlap of individual Fe-S bond in one unit cell of *Pf* Rd extracted from crystal structure of oxidized WT *Pf* Rd at 0.95 Å resolution (PDB Code 1BRF). Crystal axes are indicated at bottom left of each figure as x, y, z, which correspond to crystal *a*-, *b*-, and *c*-axis. Color code: Fe (green), S (yellow).

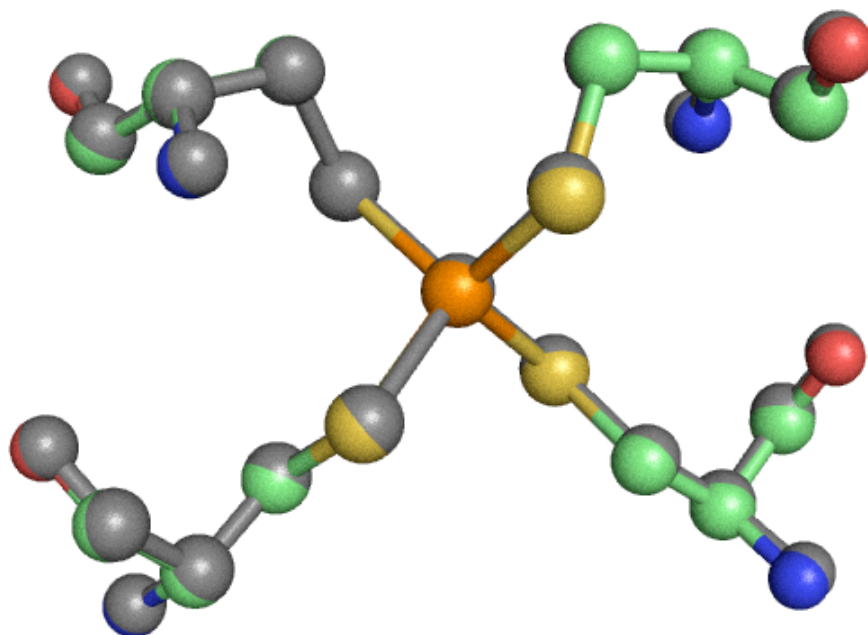

**Figure S2.** Iron site structure of oxidized WT *Pf* Rd (Color) using crystal structure coordinates (PDB code: 1BRF) compared to that of oxidized *Pf* met-Rd (Grey) using crystal structure coordinates (PDB code: 1BQ8). H atoms are omitted for clarity.

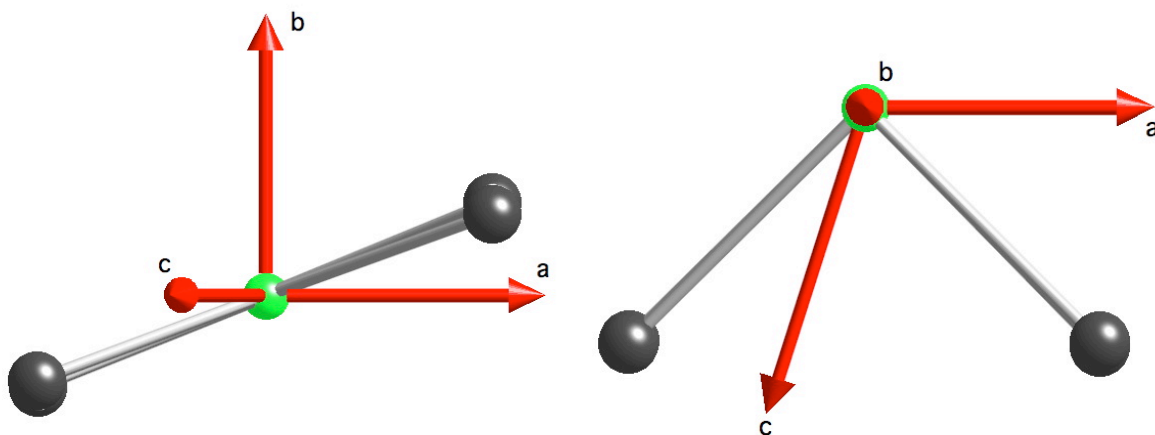

**Figure S3.** Illustration of the MoFe vector ( $C_3$  axis of the FeMo-co) geometry in the MoFe protein crystal unit cell by overlapping 4 FeMoco MoFe vectors to Fe atom using the crystal structure 1M1N. The red arrows represent the crystal axes. Color code: Fe (green), Mo (black).

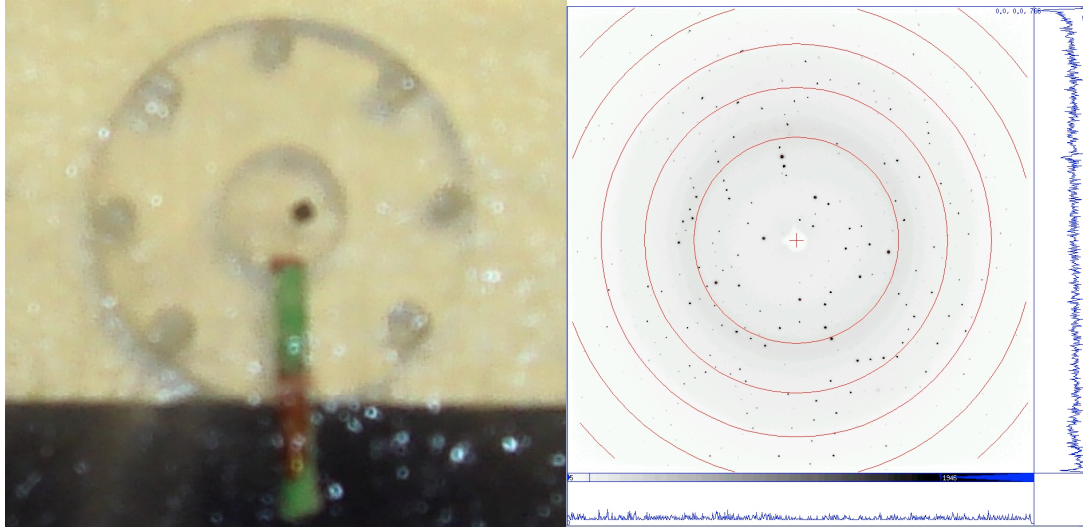

**Figure S4.** (Left) The picture of the  $c$ -axis oriented  $PfRd$  crystal when placing in the custom made Lucite disc NRVS cell; (Right) the diffraction pattern of the same crystal.

**Table S1.** EXAFS Curve Fitting Parameters for the *Pf*Rd crystals with *a*-axis and *c*-axis aligned along X-ray polarization vector <sup>a</sup>

|                   | <i>a</i> -axis aligned crystal |              |                              | <i>c</i> -axis aligned crystal |              |                              |
|-------------------|--------------------------------|--------------|------------------------------|--------------------------------|--------------|------------------------------|
|                   | <i>N</i>                       | <i>R</i> (Å) | $\sigma^2$ (Å <sup>2</sup> ) | <i>N</i>                       | <i>R</i> (Å) | $\sigma^2$ (Å <sup>2</sup> ) |
| Fe-S              | 4                              | 2.263        | 0.00226                      | 4                              | 2.283        | 0.00194                      |
| $\Delta E_0$ (eV) |                                | -10.82       |                              |                                | -11.20       |                              |
| <i>F</i>          |                                | 0.203        |                              |                                | 0.192        |                              |

<sup>a</sup>*N* = number of backscattering atoms; *R* = distance;  $\sigma^2$  = Debye-Waller factor;  $\Delta E_0$  = threshold energy; *F* = fit quality defined as  $\sqrt{[\sum(\chi_o - \chi_c)^2 k^6 / \sum \chi_o^2 k^6]}$  ( $\chi_o$  = observed EXAFS;  $\chi_c$  = calculated EXAFS). The backscattering numbers (*N*) were fixed to the values expected for the models while *R*,  $\sigma^2$  and  $\Delta E_0$  were floated. The estimated uncertainties in *R*,  $\sigma^2$  and  $\Delta E_0$  were less than  $\pm 0.01$  Å,  $\pm 0.0001$  Å<sup>2</sup>, and  $\pm 0.4$  eV, respectively. Phase and amplitude functions were calculated using FEFF 7.0.
